# Supplementary material for: Imaging of glucose metabolism by 13C-MRI distinguishes pancreatic cancer subtypes in mice
Source: eLife journal article supplement (doi:10.7554/elife.46312), 2019-08-13
Supplement: supp [file elife_poa_e46312_Figure_1_source_data_1.xlsx]

## Sheet: Concentrations in nmol per g
	Hs 766T				MIA Paca-2				Normal/Host
NAD+	369	323	348	394	288	241	331	433	229	237	271	235
cAMP	1.3	1.098	1.11	1.266	1.035	1.661	1.273	1.683	0.681	0.649	0.694	0.651
Xanthine	8.6	9.3	4.6	7.3	8	23.8	17.5	14.8	14.2	7.7	14.2	10
NADH	7.2	7.33	7.06	6.94	9.38	9.12	7.58	10.59	7.15	6.68	7.58	5.93
ADP-ribose	11	15.5	12.7	8.7	12.9	21.1	13.8	16.6	44.5	39	20	26.1
UDP-glucose	116	92	94	101	143	180	89	180	263	275	264	267
Uric acid	26.5	23.1	15.2	21.6	18	24	35.5	23.4	15	13	43	17
IMP	71.3	378.7	104.5	89.8	59.6	279.9	1185	130	53.8	32	133	57.4
NADP+	25.6	21.2	25.3	27.6	22	23.4	24.2	39.1	31.4	35.3	40.3	35.3
Glucose 6-phosphate	65.6	192.4	74.6	82.1	21.5	33.2	321.8	27.7	18.8	32.4	38	23.9
Fructose 6-phosphate	34.97	85.67	35.49	35.65	12.04	17.81	167.27	16.11	5.69	8.73	9.27	6.52
Galactose 1-phosphate	4.35	4.85	5.52	4.58	4.72	4.57	5.26	8.55	2.91	3.03	3.41	3.93
Glucose 1-phosphate	3.38	10.88	2.96	4.17	1.5	1.47	16.23	1.35	1.48	3.51	2.77	0.35
Ribose 5-phosphate	6	4.47	4.4	3.46	6.19	13.75	9.16	8.76	6.9	5.8	3.29	3.74
Ribose 1-phosphate	37.3	36.1	21.5	23.4	25.5	64	87.7	60.5	23.5	18.7	8.7	15.1
Ribulose 5-phosphate	11.01	12.35	9.62	6.5	10.43	24.01	19.52	16.95	6.81	4.81	1.55	3.66
NADPH	3.76	4.26	3.87	3.84	3.92	4.46	4.27	4.87	7.86	5.64	6.23	5.33
Phosphocreatine	33.8	102.4	78.3	50.5	52.6	4.4	44.8	9.3	61.7	137	39.2	96.9
XMP	0.32	0.36	0.26	0.17	0.25	0.66	0.45	0.33	0.61	0.29	0.58	0.59
Dihydroxyacetone phosphate	91.39	215.23	155.24	122.72	57.13	59.83	198.96	46.02	8.32	4.58	1.34	3.52
Adenylosuccinic acid	36	20.4	19.5	18.9	12.2	22.7	41.6	24.8	78.8	46.3	17.3	41
Fructose 1,6-diphosphate	117.6	158.9	116.9	146.2	52.8	89.3	183	81.4	48.8	59.2	33.9	52.3
6-Phosphogluconic acid	10	20.7	18.6	14.6	5.9	7.9	17.3	11	18.1	25.6	5.3	8.8
N-Carbamoylaspartic acid	1.39	1.16	2.25	1.32	7.18	4.07	3.47	0.8	3.86	0.14	0.45	0.8
PRPP	5.49	6.34	4.28	3.24	4.95	4.19	13.18	3.31	9.95	6.69	5.65	5.01
2,3-Diphosphoglyceric acid	5.3	21.2	48.8	16.5	8.7	26.5	5	17.2	84.9	151.9	58.6	284.9
3-Phosphoglyceric acid	6.57	20.29	24.31	9.69	4.17	3.31	8.48	1.17	11.81	13.34	5.64	6.64
GMP	47.3	15.5	29.9	24.5	84.7	154	139.8	145.7	413.1	328.5	220	307.7
AMP	288.6	97.7	193.5	155.1	374	677.8	395.2	818.5	1685.6	1828.5	1406	1668.2
GDP	75.5	38.4	57.1	55.5	86.5	94.6	61.1	122.8	134.7	204.8	177.8	190.7
Lactic acid	15326	16292	13682	12433	9783	8336	18423	4823	2030	1076	2987	1344
ADP	542.8	409	507.8	471.2	495.9	555	632.1	701.7	152.7	308.2	598.1	344.3
GTP	313	298	343	398	250.4	145.5	175.4	232.3	27.9	63.6	143.9	81.7
ATP	1731	2552	2240	2384	1032	660	1541	896	35	86	431	133
Glycerol 3-phosphate	261	388	285	264	201	308	291	150	488	244	497	487
Pyruvic acid	36.9	29.9	61.3	41.5	17.4	14.1	51.2	20.3	32.6	31.5	29.6	28.6
2-Hydroxyglutaric acid	16.9	12.4	11.6	19.1	50.1	22.3	8.8	11.2	117.6	12.9	15.5	9.1
Succinic acid	316	212	196	272	208	201	310	230	398	203	372	312
Malic acid	661	499	462	695	220	226	266	289	593	330	418	322
Fumaric acid	186.1	113	109.1	177	25.8	1.1	33.4	11	154.2	68.1	109.8	73.8
Citric acid	479	357	323	483	417	364	372	367	897	711	946	579
Urea	5914	5588	4091	5824	6765	6646	4533	7456	29621	23667	17724	21972
Gly	3372	3387	3554	3347	3647	4030	5590	4602	10319	11301	10905	11977
Putrescine	27.7	29	42.3	38.7	17.4	27.8	51.8	38.2	12.3	14.7	13.7	23.7
?-Ala	79.9	51.3	60.8	73.7	73.8	90.9	96	101.6	131.7	119.4	131	119.1
Sarcosine	3.8	5.6	5	4.3	12	11.3	6.6	10.3	170.3	43.6	41	39.3
Ala	3126	2427	3417	2830	2781	2468	4194	3925	7958	4783	6385	4980
?-Aminobutyric acid	4.7	3.5	4	5.2	6.6	6	4.1	3.4	22.4	25.2	24.2	60.1
Choline	472	311	364	419	220	307	464	328	988	1023	1213	1148
Ser	265	340	635	285	627	926	1176	953	2046	1566	1946	2034
Creatinine	10.4	16.1	10.7	10.9	6.6	11.5	16.2	7.8	43.5	43	29.8	50.5
Pro	824.8	471.8	1018.5	754.1	1324.3	844	1014.6	619.7	1216.5	509.8	1120.4	911
Betaine	178.9	101.4	217.8	166.8	218	402.3	415.1	448.8	4638.4	4008.6	2491.6	3587.2
Val	337.1	261	446.6	355.9	486	376.3	412.3	359.5	1617.2	1236.8	1235.8	1679
Thr	802	582.4	1061.5	622.9	936.3	802.9	1178.6	1257.6	2188.2	767.4	843.3	931.2
Homoserine	2.66	1.76	3.24	2.62	3.45	4.27	4.28	3.3	8.91	4.93	5.3	11.74
Hydroxyproline	186	212	249	163	211	237	292	297	1453	1112	667	1072
Creatine	4001	7524	5928	4671	2822	3082	9935	3175	9771	12458	6270	18048
Ile	126	96	145	125	173	146	184	136	125	118	226	291
Leu	300	232	338	293	406	349	403	379	1429	1355	1401	1478
Asn	249	191	295	264	196	218	445	382	585	266	774	531
Ornithine	29	23	43	28	57	44	24	38	970	634	595	599
Asp	1130	964	1015	1154	583	814	772	1488	3924	2224	2784	2569
Adenine	0.71	0.86	0.43	0.74	1.06	0.67	1.3	1.11	4.74	5.27	5.06	5.24
Hypoxanthine	38.2	37.1	12	23.9	13.9	91.5	109.9	76.5	166.4	81.2	139.1	117.3
Spermidine	23.5	22	24.7	23.9	11.2	13.8	19	16.6	58.1	60.2	24.2	57.5
Gln	3091	2587	2399	3549	2734	2667	2730	2982	5753	5305	7853	5045
Lys	361	352	453	329	469	336	534	352	1098	1042	1390	946
Glu	6230	4789	5231	6349	7458	7283	6218	9885	21196	16548	15742	20082
Met	138	106	180	108	101	97	159	125	428	279	252	348
His	239	197	206	228	201	162	203	126	1220	762	1302	910
Carnitine	234	217	273	204	473	442	468	692	382	380	437	365
Phe	189	148	191	189	177	147	188	166	773	472	651	542
Arg	99	110	147	81	119	159	162	150	600	591	507	752
Citrulline	173	148	210	125	176	169	157	194	1159	1237	773	1253
Tyr	198	150	198	182	110	88	181	127	478	466	494	1021
Trp	89.2	72	61.9	97.7	57.4	39.5	58.9	56	324.2	198.8	395.1	416.8
Cystathionine	11.7	10.1	10.1	17.1	208.2	307.6	268.8	474.8	114.8	87.5	137.8	84.8
Adenosine	307	81	162	105	315	234	127	255	101	117	142	140
Inosine	246	237	144	140	191	320	673	335	407	312	213	251
Guanosine	46.9	17.7	21.4	20.8	58.4	50	48.8	49.3	15.9	12.8	21.8	14
Argininosuccinic acid	8.4	6.9	8.1	6.8	4.5	5.9	5.9	7.2	82.8	63.3	50.2	61.7
Glutathione (GSSG)	1379	1070	1199	1377	1308	1576	1751	2230	74	157	739	250
S-Adenosylmethionine	33	28.8	27.9	29.3	42.8	42.8	54.8	54.8	171	112.7	131.7	79.5
Adenylate Energy Charge	0.781	0.901	0.848	0.87	0.673	0.495	0.723	0.516	0.06	0.108	0.3	0.142
Total Adenylate	2562	3059	2941	3011	1902	1892	2568	2417	1874	2223	2435	2146
Guanylate Energy Charge	0.805	0.901	0.864	0.891	0.696	0.489	0.547	0.586	0.166	0.278	0.43	0.305
Total Guanylate	435	352	430	478	422	394	376	501	576	597	542	580
Total Glutathione	2758	2140	2398	2753	2615	3152	3565	4459	344	668	4285	1223
NADPH/NADP+	0.147	0.201	0.153	0.139	0.178	0.191	0.176	0.125	0.25	0.16	0.155	0.151
NADH/NAD+	0.0195	0.0227	0.0203	0.0176	0.0326	0.0378	0.0229	0.0245	0.0312	0.0282	0.028	0.0252
Glycerol 3-phosphate/DHAP	2.9	1.8	1.8	2.2	3.5	5.1	1.5	3.3	58.7	53.4	369.8	138.4
Total Amino Acids	21165	17464	20992	21144	22587	21951	25805	28073	63732	50687	56765	58268
Total Essential Amino Acids	2581	2046	3083	2349	3007	2456	3321	2958	9203	6232	7695	7541
Total Non-essential Amino Acids	18583	15418	17909	18795	19580	19496	22484	25115	54529	44454	49070	50728
Total Glucogenic Amino Acids	20504	16880	20202	20521	21711	21266	24868	27341	61205	48289	53974	55845
Total Ketogenic Amino Acids	2065	1632	2448	1839	2329	1909	2728	2475	6416	4420	5399	5625
Total BCAA	763	589	930	774	1065	871	999	875	3172	2710	2862	3448
Total Aromatic Amino Acids	476	370	451	469	345	275	429	350	1575	1137	1539	1980
Fischer's Ratio	1.6	1.59	2.06	1.65	3.09	3.17	2.33	2.5	2.01	2.38	1.86	1.74
Total Glu-related Amino Acids	10482	8155	9001	10961	11837	11114	10328	13763	29985	23716	26525	27700
Total Pyr-related Amino Acids	7654	6809	8729	7183	8049	8266	12198	10794	23289	19510	21034	21164
Total Acetyl CoA-related Amino Acids	876	752	998	845	1106	870	1180	924	2977	2714	3411	3131
Total Fumarate-related Amino Acids	387	298	389	371	287	235	370	293	1251	939	1144	1563
Total Succinyl CoA-related Amino Acids	602	463	772	589	759	619	755	621	2171	1634	1713	2318
Total Oxaloacetate-related Amino Acids	1379	1156	1311	1418	778	1032	1218	1870	4510	2490	3558	3100
Malate/Asp	0.585	0.517	0.455	0.602	0.377	0.278	0.344	0.194	0.151	0.148	0.15	0.125
Citrulline/Ornithine	6.039	6.291	4.827	4.487	3.092	3.822	6.479	5.077	1.195	1.953	1.3	2.09
G6P/R5P	10.94	43.04	16.96	23.74	3.48	2.41	35.12	3.17	2.73	5.59	11.55	6.37
Putrescine/Spermidine	1.177	1.318	1.714	1.62	1.55	2.017	2.732	2.296	0.212	0.244	0.563	0.411
Glu/Gln	2.02	1.85	2.18	1.79	2.73	2.73	2.28	3.31	3.68	3.12	2	3.98
ATP/ADP	3.19	6.24	4.41	5.06	2.08	1.19	2.44	1.28	0.23	0.28	0.72	0.39
ATP/AMP	6	26.12	11.57	15.38	2.76	0.97	3.9	1.1	0.02	0.05	0.31	0.08
